# Supplementary material for: Proposal of a new visual analogue scale to describe the extent of lymphadenectomy in right-sided colectomy for cancer – A prospective observational study
Source: Research Square preprint supplement (doi:10.21203/rs.3.rs-6446786/v1), 2025-05-09

# Right colectomy: Intraoperative form 1

Operation date: \_\_\_\_\_

Surgeon: \_\_\_\_\_

Patient name/ study ID: \_\_\_\_\_

Birthdate: \_\_\_\_\_

Anatomy preop CT:

ICA in front of SMA: Yes ☐ No ☐ NA ☐

JJ veins in front of SMA: Yes ☐ No ☐ NA ☐

Distance of ICV to GTH (mm) \_\_\_\_\_

Planned extend of resection:

D2 ☐

Complete D2 ☐

D3 ☐

Access:

Robotic ☐

Laparoscopic ☐

Open ☐

Converted ☐

Anastomosis:

Extracorporeal ☐

Intracorporeal ☐

Handsewn ☐

Stapler ☐

Operation performed:

D2 ☐

Complete D2 ☐

D3 ☐

Bleeding:

None ☐

Surgical hemostasis ☐

Blood loss (ml) \_\_\_\_\_

Intraoperative surgical complications:

None ☐

Bowel lesion ☐

Vascular lesion ☐

Other ☐

Intraoperative general complications:

None ☐

Cardiac ☐

Respiratory ☐

Other ☐

Specimen quality:

0 ☐

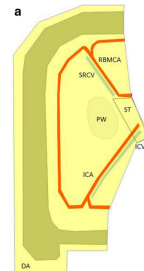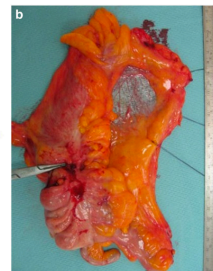

I ☐

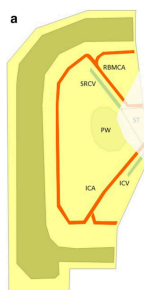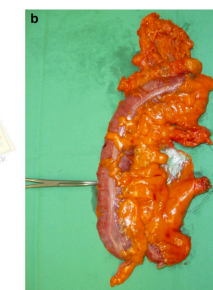

II ☐

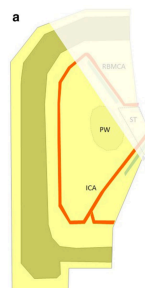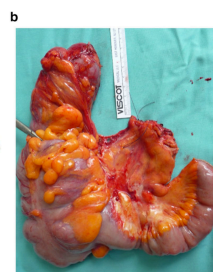

III ☐

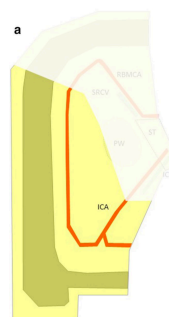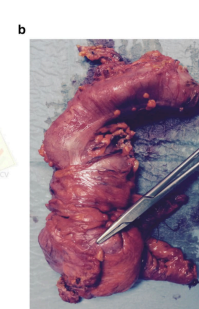

Right colectomy: Intraoperative form 2

Vascular anatomy:

Blood vessel visualized:

SMV☐

GTH☐

SMA☐

MCA☐

Level of vascular ligature:

To the right of SMV☐

Central☐

Photodocumentation: ☐

Extend of lymphadenectomy:

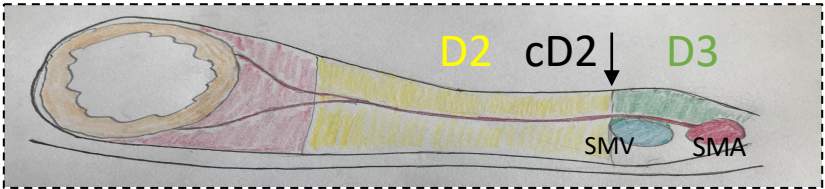

Mark with cross

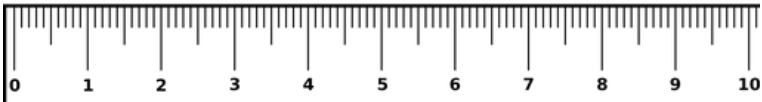

Supplement: Supplementary file [file a8ed13b9d72e5da559ef7fa6.pdf]
